# Supplementary material for: Facile potentiostatic preparation of functionalized polyterthiophene-anchored graphene oxide as a metal-free electrocatalyst for the oxygen reduction reaction
Source: Royal Society of Chemistry journal article supplement (doi:10.1039/c4ta06774f), 2015-01-01
Supplement: c4ta06774f1.pdf [file c4ta06774f1.pdf]

## Supporting Information

### Facile Potentiostatic Preparation of Functionalized Polyterthiophene Anchored Graphene Oxide as Metal-Free Electrocatalysts for Oxygen Reduction Reaction

M. Halappa Naveen,<sup>a</sup> Hui-Bog Noh,<sup>a</sup> Md Shahriar Al Hossain,<sup>b</sup> Jung Ho Kim,<sup>\*,b</sup> and Yoon-Bo Shim<sup>\*,a</sup>

<sup>a</sup> Department of Chemistry, Pusan National University, Busan 609-735, Republic of Korea

<sup>b</sup> Institute for Superconducting and Electronic Materials, Australian Institute for Innovative Materials, University of Wollongong, North Wollongong, NSW 2500, Australia

[\*] Corresponding authors: [ybshim@pusan.ac.kr](mailto:ybshim@pusan.ac.kr), [jhk@uow.edu.au](mailto:jhk@uow.edu.au),

## Contents

1. Chemical structures of all the monomers.
2. HR-TEM images of GO at (a) high magnification and (b) low magnification.
3. Comparison of XPS spectra of all the monomer-GO complexes.
4. XPS high resolution N 1s spectra of poly(APT) (a-(i)) and poly(APT-GO) (a-(ii)), and (b) high resolution S 2p spectrum of poly(APT-GO) sample.
5. CVs recorded for the poly(APT-GO), APT-GO, TBA-GO, and TCA-GO electrodes in O<sub>2</sub> saturated 0.1 M NaOH solution at a scan rate of 50 mV/s.
6. Koutecky-Levich plots for (a) poly(TCA-GO) and (b) poly(TBA-GO).
7. Kinetic current density vs. potential for poly(APT), poly(APT-RGO), and poly(APT-GO) electrodes, and CVs of poly(APT-GO) electrode from continuous potential cycling up to 15000 cycles.

## Chemical structures of all the monomers

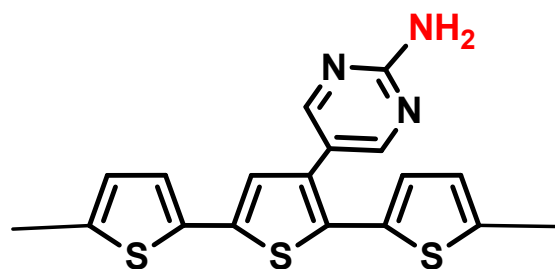

APT

3'-(2-aminopyrimidyl)-2,2':5',2''-terthiophene

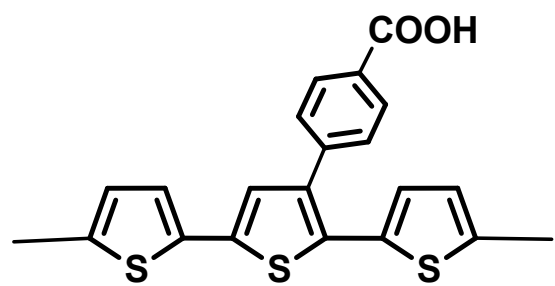

TBA

3'-(*p*-benzoic acid)-2,2':5',2''-terthiophene

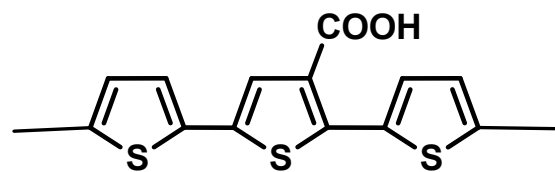

TCA

3'-(carboxylic acid)-2,2':5',2''-terthiophene

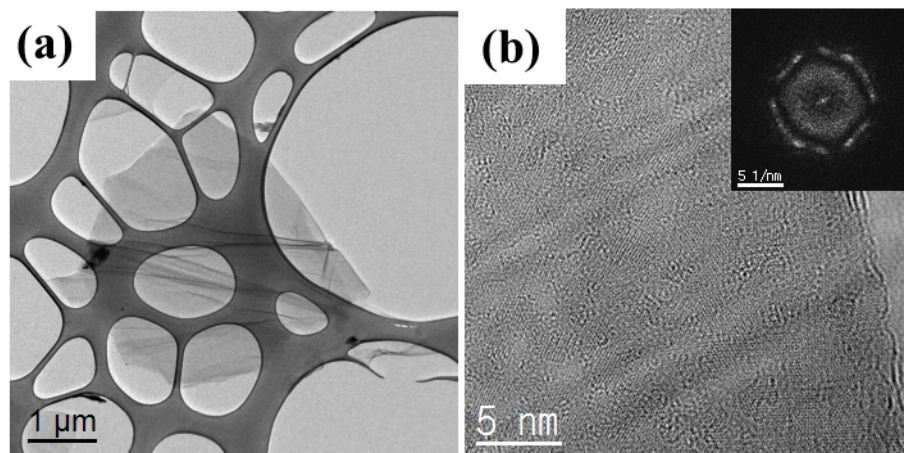

**Figure S1.** HR-TEM images of GO at (a) high magnification and (b) low magnification (inset: FFT pattern of the corresponding image).

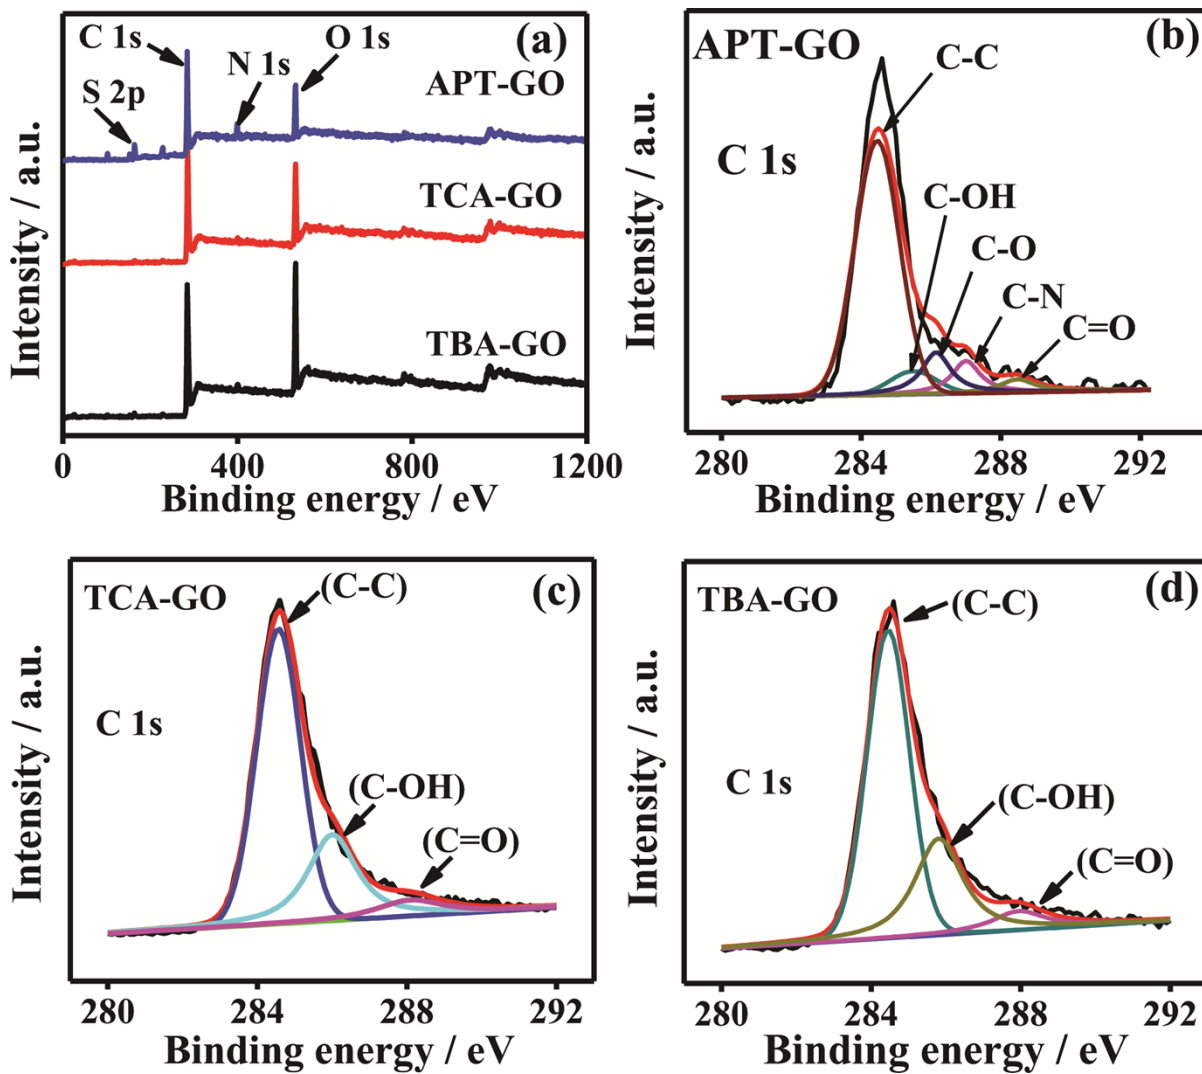

**Figure S2.** (a) XPS survey spectra of APT-GO, TCA-GO, and TBA-GO samples; high resolution C 1s spectra of (b) APT-GO, (c) TCA-GO, and (d) TBA-GO.

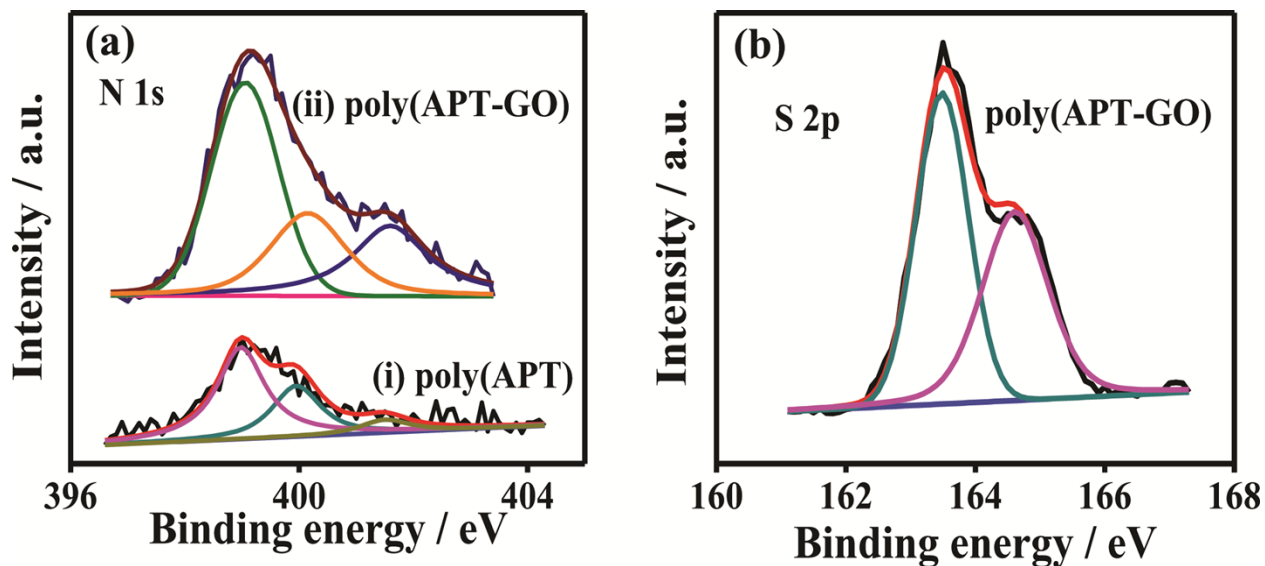

**Figure S3.** (a) XPS high resolution N 1s spectra of poly(APT) (a-(i)) and poly(APT-GO) (a-(ii)), and (b) high resolution S 2p spectrum of poly(APT-GO) sample.

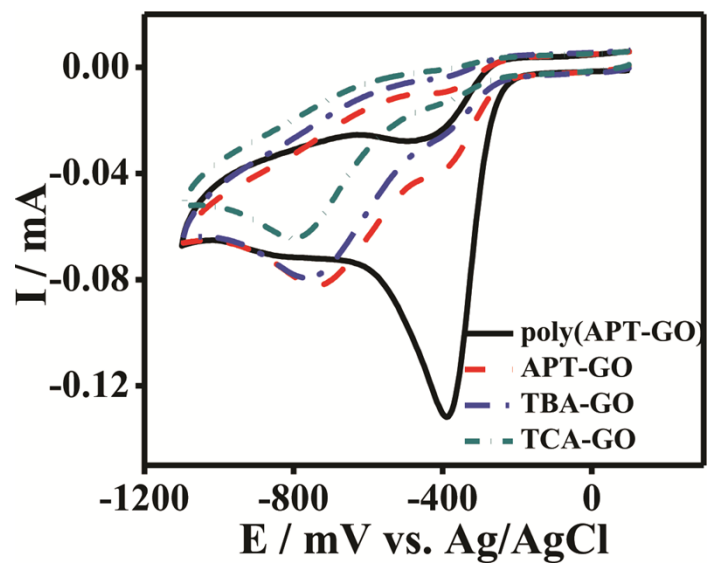

**Figure S4.** CVs recorded for the poly(APT-GO), APT-GO, TBA-GO, and TCA-GO electrodes in O<sub>2</sub> saturated 0.1 M NaOH solution at a scan rate of 50 mV/s.

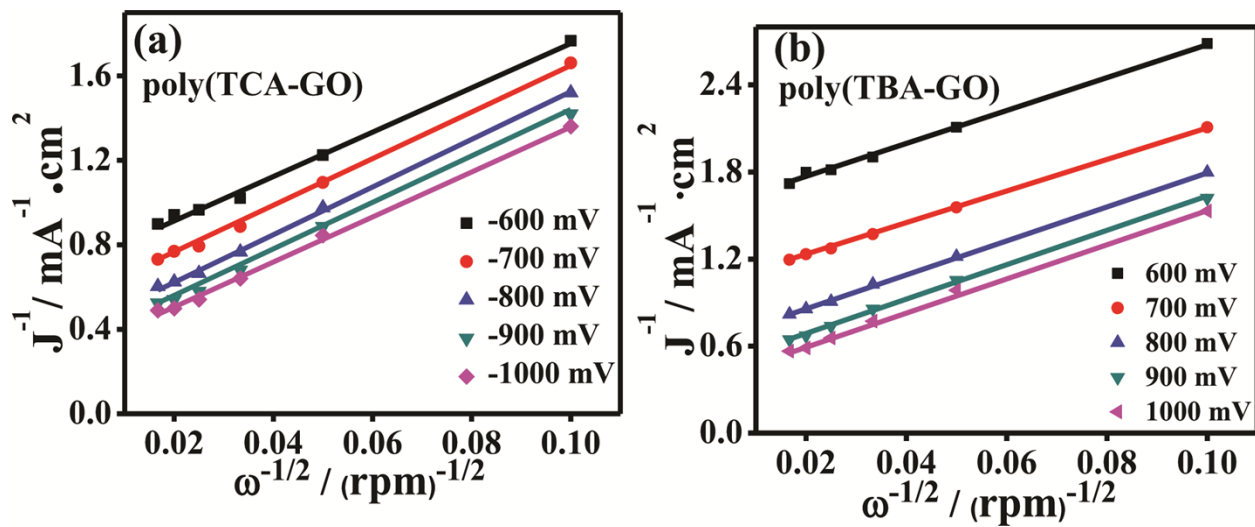

**Figure S5.** Koutecky-Levich plots for (a) poly(TCA-GO) and (b) poly(TBA-GO).



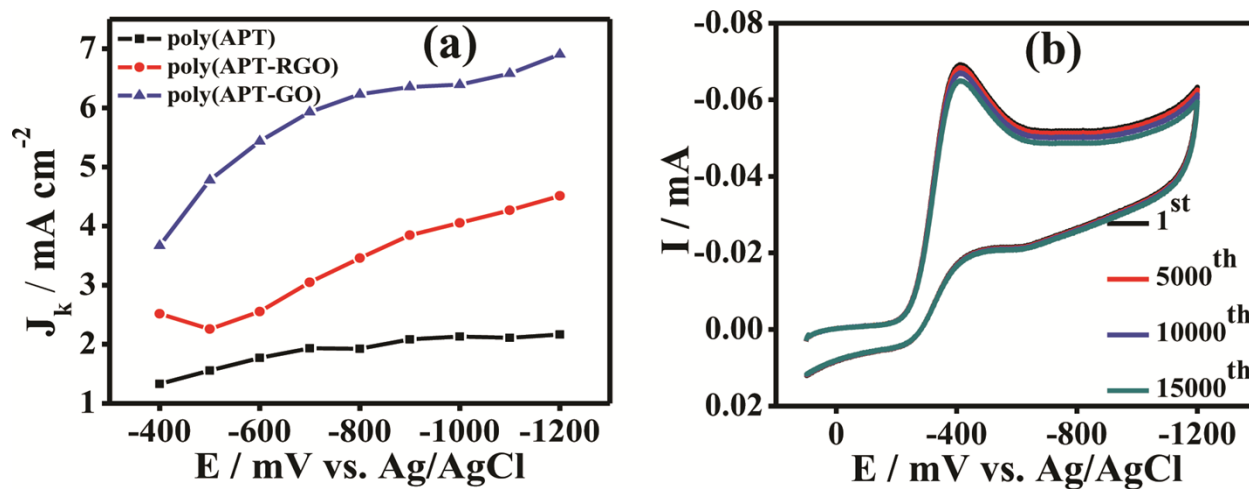

**Figure S6.** (a) Kinetic current density vs. potential for poly(APT), poly(APT-RGO), and poly(APT-GO) electrodes, and (b) CVs of poly(APT-GO) electrode for selected continuous potential cycling up to 15000 cycles in a 0.1 M NaOH solution at scan rate of 50 mV/s.
